# Supplementary material
Source: PubMed Central journal article supplement (PMC4291126)
Supplement: NIHMS653092-supplement-01.pdf [file NIHMS653092-supplement-01.pdf]

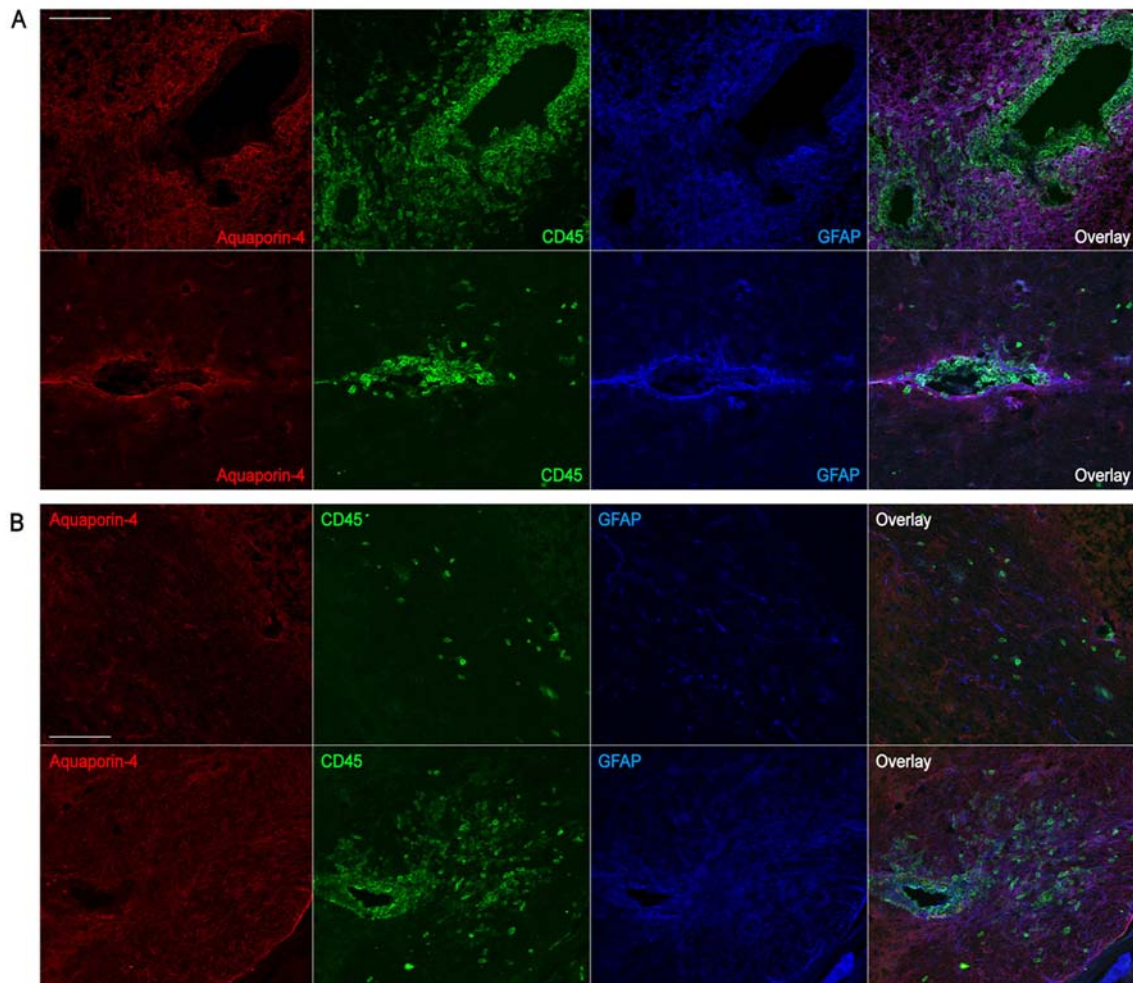

**Supplementary Figure 1. Leukocyte infiltration in WT and GFAP-IκBα-dn cerebellum following EAE.**  
 (A) Immunofluorescent labeling of WT and GFAP-IκBα-dn tissue sections at 20 dpi (acute disease). (B) Immunofluorescent labeling of WT and GFAP-IκBα-dn tissue sections at 40 dpi (chronic disease). Red: Aquaporin-4 (localized to astrocyte endfeet in contact with the vascular endothelium). Green: pan-leukocyte marker CD45. Blue: astrocyte-specific marker GFAP. Scale bar: 100 μm.

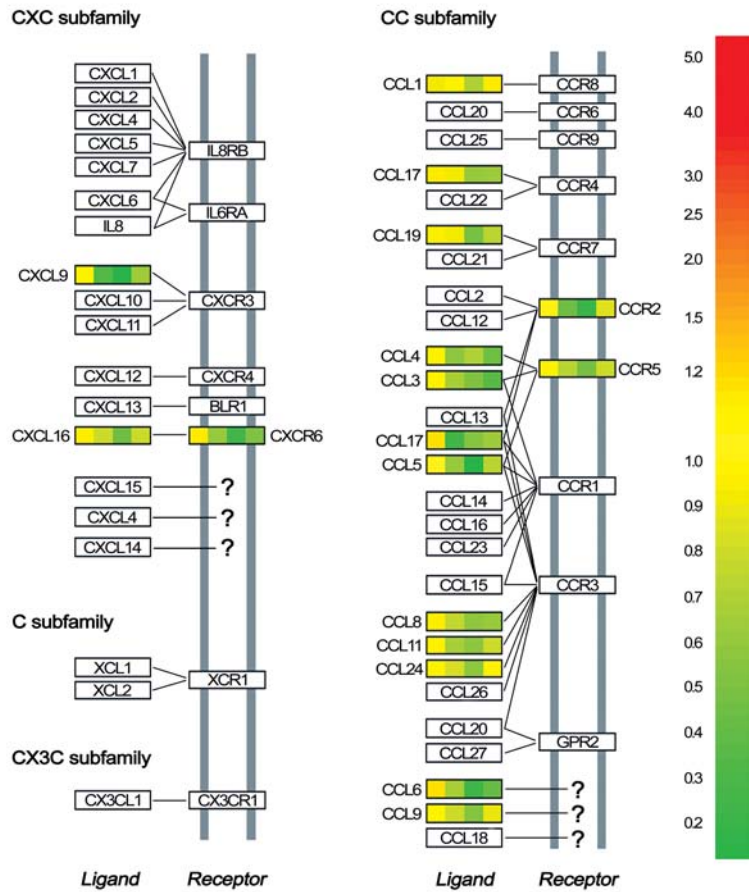

Supplementary Figure 2. Schematic of the differentially expressed genes of the chemokine-chemokine receptor pathway at 17 dpi. Each colored rectangle is divided into 4 areas representing, from left to right, gene expression at naive, 10, 17, and 80 dpi time points. gene expression is predominantly downregulated in GFAP-I $\kappa$ B $\alpha$ -dn mice compared to WT.

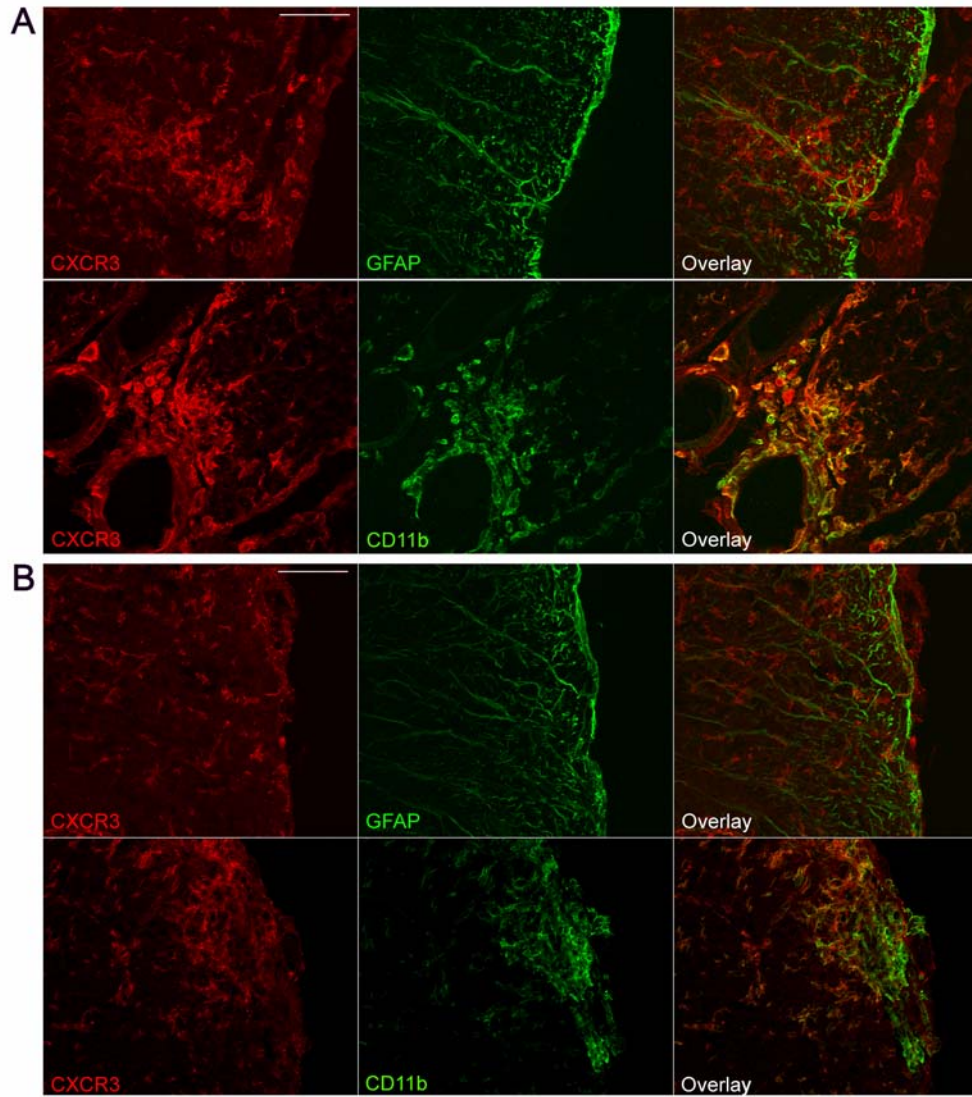

Supplementary Figure 3. CXCR3 protein localization in WT and GFAP-IκBα-dn spinal cords following EAE. Immunofluorescent labeling of WT (A) and GFAP-IκBα-dn (B) tissue sections at 20 dpi (acute disease). Red: CXCR3. Green: GFAP or CD11b. Scale bar: 100 μm.

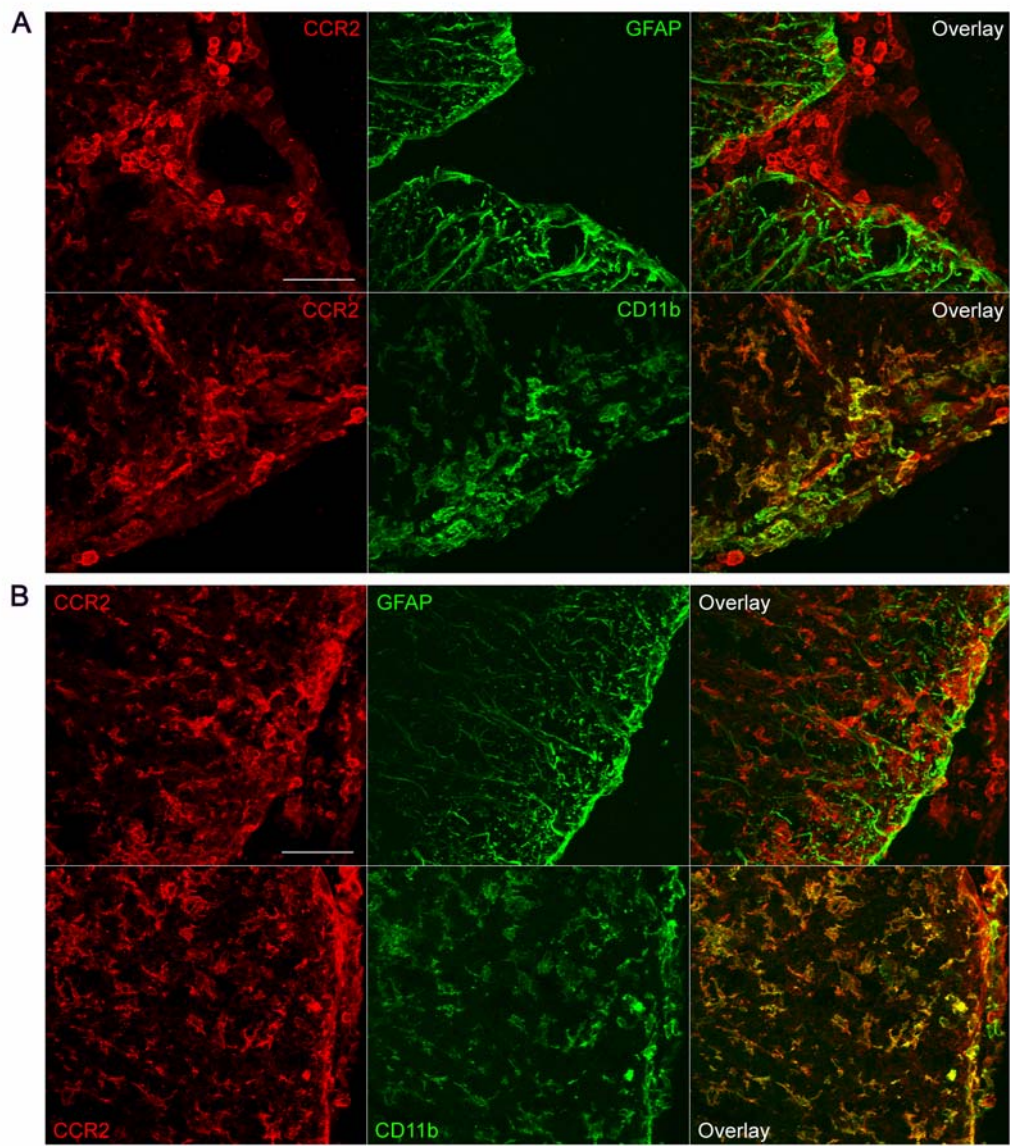

**Supplementary Figure 4. CCR2 protein localization in WT and GFAP-IκBα-dn spinal cords following EAE.** Immunofluorescent labeling of WT (A) and GFAP-IκBα-dn (B) tissue sections at 20 dpi (acute disease). Red: CCR2. Green: GFAP or CD11b. Scale bar: 100 μm.

| Days post-induction | Total number of differentially expressed genes | Genes downregulated in GFAP-I $\kappa$ B $\alpha$ -dn mice | Genes upregulated in GFAP-I $\kappa$ B $\alpha$ -dn mice |
|---------------------|------------------------------------------------|------------------------------------------------------------|----------------------------------------------------------|
| naive               | 13                                             | 7 (53.8%)                                                  | 6 (46.2%)                                                |
| 10                  | 89                                             | 79 (88.8%)                                                 | 10 (11.2%)                                               |
| 17                  | 1545                                           | 1359 (88.0%)                                               | 186 (12.0%)                                              |
| 80                  | 380                                            | 349 (91.8%)                                                | 31 (8.2%)                                                |

**Supplementary Table 1. Microarray data summary.** Number of differentially expressed genes between WT and GFAP-I $\kappa$ B $\alpha$ -dn mice at various time points following EAE. Results are derived from the analysis of 3 biological replicates/time point.

| Pathway                                                               | Genes | P value  |
|-----------------------------------------------------------------------|-------|----------|
| <b>GFAP-I<math>\kappa</math>B<math>\alpha</math>-dn vs WT, 17 dpi</b> |       |          |
| Antigen processing and presentation                                   | 37    | 1.03e-27 |
| Cell adhesion molecules                                               | 38    | 5.79e-19 |
| Type I diabetes mellitus                                              | 26    | 9.02e-18 |
| Cytokine-cytokine receptor interaction                                | 41    | 1.10e-13 |
| Toll-like receptor signaling pathway                                  | 20    | 2.18e-8  |
| Natural killer-mediated cytotoxicity                                  | 21    | 8.44e-8  |
| Apoptosis                                                             | 12    | 7.19e-7  |
| Leukocyte transendothelial migration                                  | 20    | 1.04e-6  |
| T cell receptor signaling pathway                                     | 18    | 3.24e-6  |
| B cell receptor signaling pathway                                     | 15    | 8.33e-6  |
| Inflammatory response pathway                                         | 10    | 2.14e-5  |
| Fc epsilon RI signaling pathway                                       | 14    | 4.27e-4  |
| Hematopoietic cell lineage                                            | 14    | 3.15e-3  |
| Glutathione metabolism                                                | 8     | 1.61e-2  |
| <b>GFAP-I<math>\kappa</math>B<math>\alpha</math>-dn vs WT, 80 dpi</b> |       |          |
| Antigen processing and presentation                                   | 11    | 1.18e-7  |
| Cell adhesion molecules                                               | 10    | 3.47e-4  |
| Complement and coagulation molecules                                  | 7     | 5.81e-4  |
| Type I diabetes mellitus                                              | 7     | 7.12e-4  |
| Leukocyte transendothelial migration                                  | 8     | 2.22e-3  |
| ECM receptor interaction                                              | 7     | 2.30e-3  |
| Focal adhesion                                                        | 10    | 3.82e-3  |
| B cell receptor signaling pathway                                     | 6     | 1.13e-2  |
| Cell communication                                                    | 7     | 1.57e-2  |
| Aminosugars metabolism                                                | 4     | 1.70e-2  |
| Glycan structures degradation                                         | 4     | 2.00e-2  |
| Fc epsilon RI signaling pathway                                       | 6     | 2.69e-2  |
| Toll-like receptor signaling pathway                                  | 6     | 4.43e-2  |

**Supplementary Table 2. Pathway analysis of GFAP-I $\kappa$ B $\alpha$ -dn versus WT mice at 17 and 80 dpi.**

The pathways that are significantly changed between transgenic and WT mice are listed. Analysis was performed with the software GeneSpring 7.3 (Agilent Technologies Inc.).

| Gene                    | Primer Sequence                                                       | Product Length | Optimal A <sub>temp</sub> |
|-------------------------|-----------------------------------------------------------------------|----------------|---------------------------|
| <b>ICAM-1</b>           | F: 5' acgagacggactgcttggggaact 3'<br>R: 5' ccgtctgcaggtcatcttaggag 3' | 104 bp         | 56.6°C                    |
| <b>VCAM-1</b>           | F: 5' atacagcttacagtctttccatct 3'<br>R: 5' gtctcctgtctttgctttctctt 3' | 123 bp         | 50.3°C                    |
| <b>Itgβ<sub>5</sub></b> | F: 5' attcccaactgcgtcccctcctt 3'<br>R: 5' gacaccctctgcttctcactt 3'    | 99 bp          | 55.3°C                    |
| <b>Itgβ<sub>7</sub></b> | F: 5' cattctgtgcgcataggttttg 3'<br>R: 5' agtcggctggggcatgggtggtg 3'   | 101 bp         | 55.3°C                    |
| <b>Itgα<sub>x</sub></b> | F: 5' tgccactgtctgccttcata 3'<br>R: 5' agcccgggtctttgtctcct 3'        | 139 bp         | 54.8°C                    |
| <b>Fibronectin-1</b>    | F: 5' ggcagaggggagtgaagtgtgag 3'<br>R: 5' ctgggggtgagtctgcggttgga 3'  | 111 bp         | 57.4°C                    |
| <b>CCL2</b>             | F: 5' cccactcacctgctgtac 3'<br>R: 5' cctgctgctggtgattctctt 3'         | 86 bp          | 52.9°C                    |
| <b>CCR2</b>             | F: 5' agcctgatcctgecttactgtc 3'<br>R: 5' cagccctgtcctcttctctc 3'      | 97 bp          | 54.0°C                    |
| <b>CCL5</b>             | F: 5' tgcccacgtcaaggagtatttcta 3'<br>R: 5' tggcgggtccttcgagtgacaa 3'  | 81 bp          | 53.1°C                    |
| <b>CXCL9</b>            | F: 5' agtccgctgttctttcttttg 3'<br>R: 5' gtgcctcggctggtgctgat 3'       | 112 bp         | 54.9°C                    |
| <b>CXCL10</b>           | F: 5' gccgtcattttctgectcatct 3'<br>R: 5' ctattctcactggcccgtcctc 3'    | 113 bp         | 57.2°C                    |
| <b>CXCR3</b>            | F: 5' ctctcttctgctgggctgcta 3'<br>R: 5' gaaggtgtccgtgctgctca 3'       | 90 bp          | 56.7°C                    |
| <b>IFN<sub>γ</sub></b>  | F: 5' aggaactggcaaaaggatggtgac 3'<br>R: 5' tgacgctatgttgttctgatgg 3'  | 118 bp         | 53.1°C                    |
| <b>TNFα</b>             | F: 5' aggcactccccaaaagatg 3'<br>R: 5' tcaccccgaagttcagtagacaga 3'     | 123 bp         | 56.6°C                    |
| <b>IL1β</b>             | F: 5' cttcaaatctcacagcagcacatc 3'<br>R: 5' ccacgggaaagacacaggtag 3'   | 102 bp         | 53.4°C                    |
| <b>IL6</b>              | F: 5' aaccacggccttccctacttca 3'<br>R: 5' tcattccacgattcccagag 3'      | 134 bp         | 54.1°C                    |
| <b>LIF</b>              | F: 5' gtgcgctaacaatgacagactcc 3'<br>R: 5' gaccatccgatacagctccacaa 3'  | 83 bp          | 54.2°C                    |
| <b>IL12Rβ1</b>          | F: 5' ctgcgcagccgagtgatgta 3'<br>R: 5' gctaaagcgtggggatgac 3'         | 87 bp          | 56.9°C                    |
| <b>Neurofilament-1</b>  | F: 5' gagtggtccgagtgaggttg 3'<br>R: 5' ggccgagcgcatacctctgtgtt 3'     | 72 bp          | 54.4°C                    |
| <b>SNAP25</b>           | F: 5' gcaataatcaggatggagtagtgg 3'<br>R: 5' catttcccggcatcgtttgta 3'   | 117 bp         | 55.5°C                    |
| <b>Tau</b>              | F: 5' cgcacccatccctaccaacacc 3'<br>R: 5' cagtctgcagcggctcttac 3'      | 106 bp         | 57.9°C                    |
| <b>Synaptotagmin XI</b> | F: 5' gggcctccgtgctggtggtg 3'<br>R: 5' tggcgggtcttctgtcttctc 3'       | 92 bp          | 58.3°C                    |
| <b>MBP</b>              | F: 5' cggggctctggcaaggactcacac 3'<br>R: 5' tggactactgggtttcatctt 3'   | 101 bp         | 54.3°C                    |
| <b>MOBP</b>             | F: 5' gctgccaccctcacttctc 3'<br>R: 5' ggcacagcagatccagctctc 3'        | 116 bp         | 55.8°C                    |

**Supplementay Table 3. List of primers used for real time PCR amplification**
